# Supplementary material for: An NMR study on the mechanisms of freezing and melting of water confined in spherically mesoporous silicas SBA-16
Source: Royal Society of Chemistry journal article supplement (doi:10.1039/c6cp03111k), 2016-01-01
Supplement: c6cp03111k1.pdf [file c6cp03111k1.pdf]

**Electronic Supplementary Information (ESI)**

**NMR Study on the Mechanisms of Freezing and Melting of Water  
Confined in Spherically Mesoporous Silicas SBA-16**

Tatsuya Miyatou,<sup>a</sup> Ryutaro Ohashi,<sup>a</sup> Tomonori Ida,<sup>a</sup> Shigeharu Kittaka<sup>\*b</sup> and Motohiro Mizuno<sup>\*a</sup>

<sup>a</sup> *Department of Chemistry, Graduate School of Natural Science and Technology,*

*Kanazawa University, Kakuma-machi, Kanazawa, Ishikawa 920-1192, Japan.*

<sup>b</sup> *Department of Chemistry, Faculty of Science, Okayama University of Science, 1-1 ridaicho, Nakaku,  
Okayama 700-0005, Japan.*

**Corresponding author:** Motohiro Mizuno

**Email:** mizuno@se.kanazawa-u.ac.jp

**Tel:** 81-76-261-2448

**Fax:** 81-76-261-2448

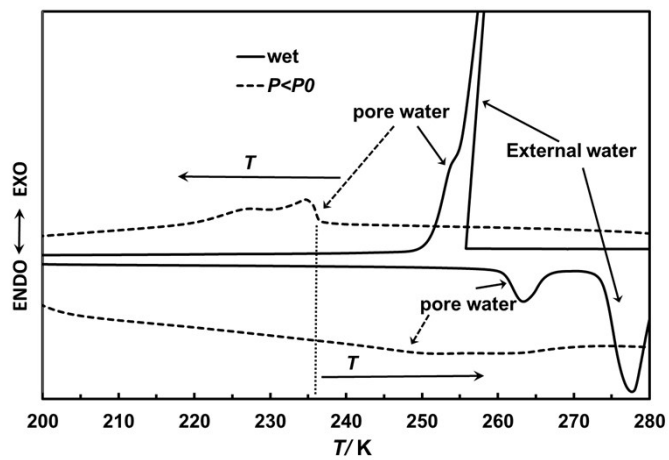

**Figure S1.** DSC curves of D<sub>2</sub>O fully and partially confined in MCM-41(C22).

(a)

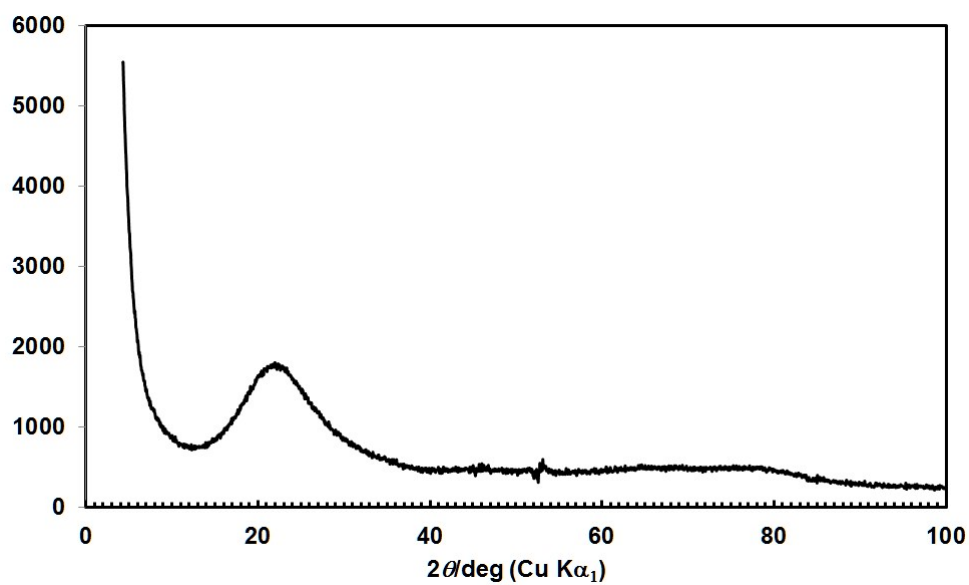

(b)

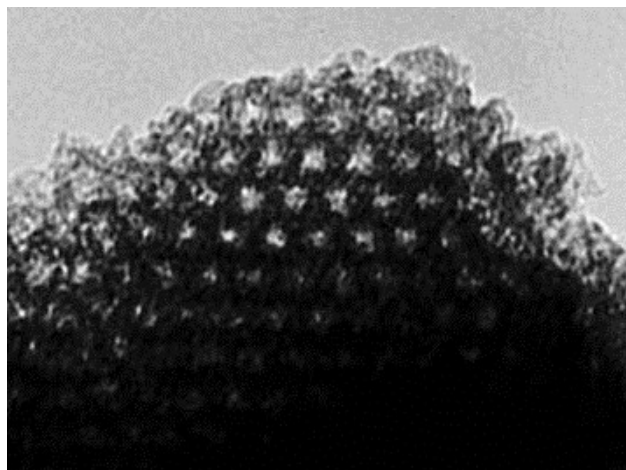

**Figure S2.** (a) X-ray powder diffraction pattern (XRPD) for SBA-16(80), (b) Transmission electron microscopy (TEM) image for SBA-16(120).

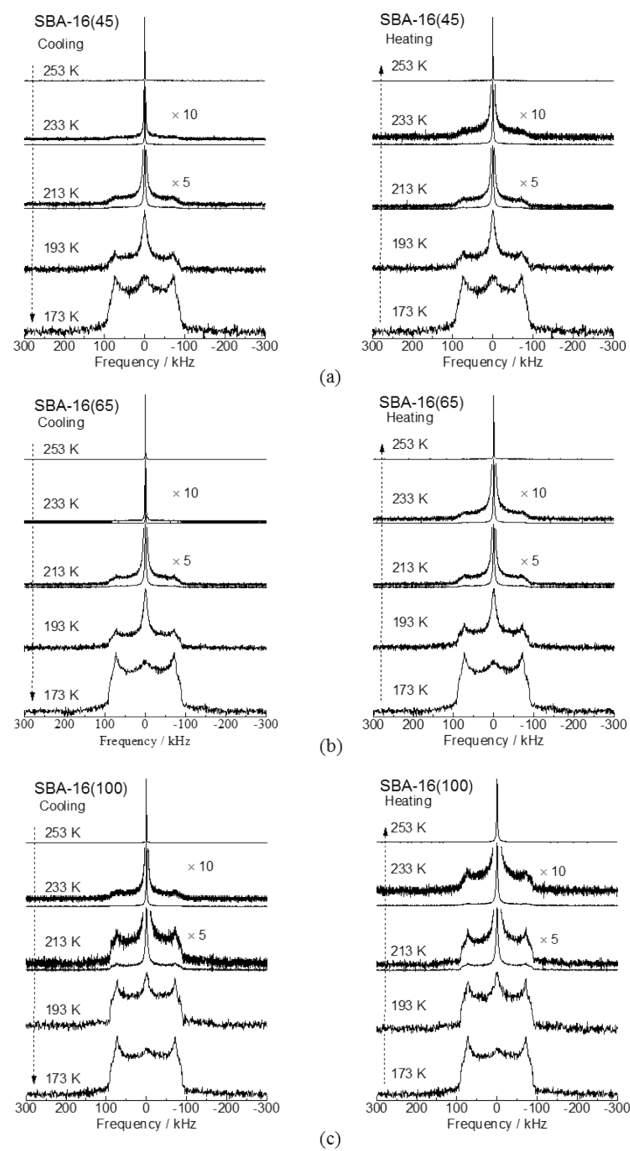

**Figure S3.**  $^2\text{H}$  NMR spectra of  $\text{D}_2\text{O}$  confined in (a) SBA-16(45), (b) SBA-16(65), and (c) SBA-16(100).

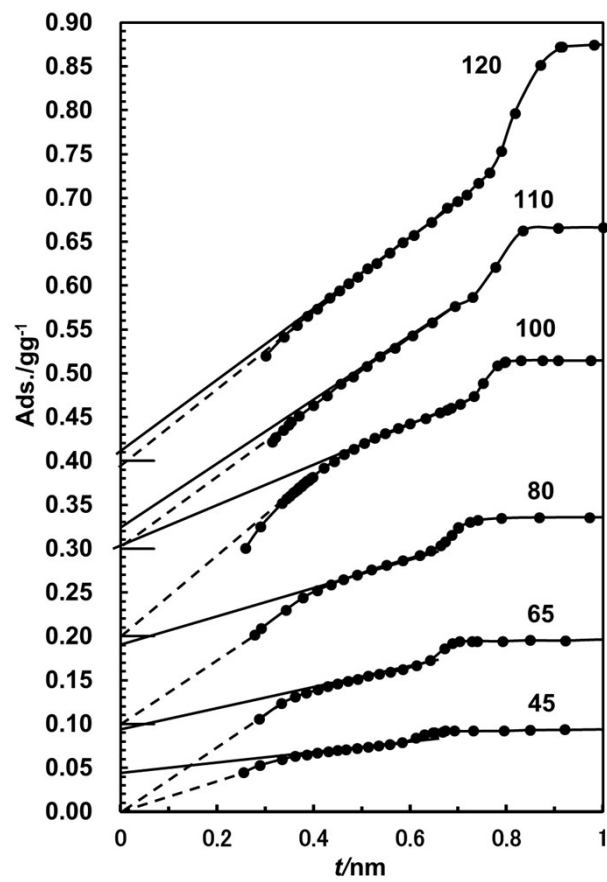

**Figure S4.** *t*-plot of adsorption isotherms of N<sub>2</sub> on SBA-16. *t*-value is a measure of pore radius (13).

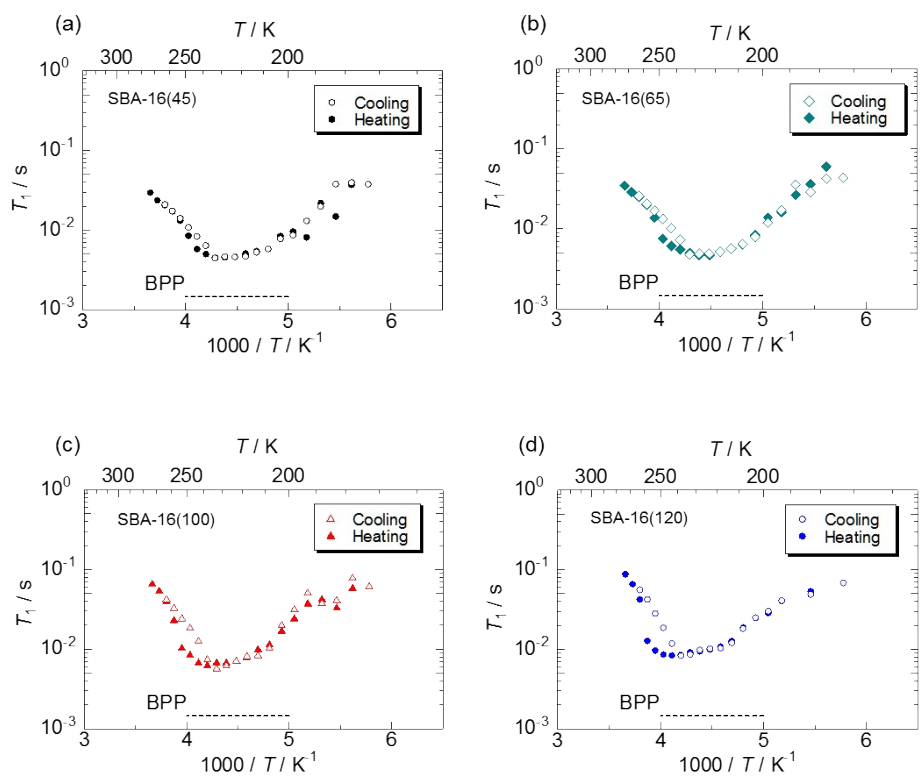

**Figure S5.**  $^2\text{H}$  NMR  $T_1$  of  $\text{D}_2\text{O}$  confined in (a) SBA-16(45), (b) SBA-16(65), (c) SBA-16(100), and (d) SBA-16(120).

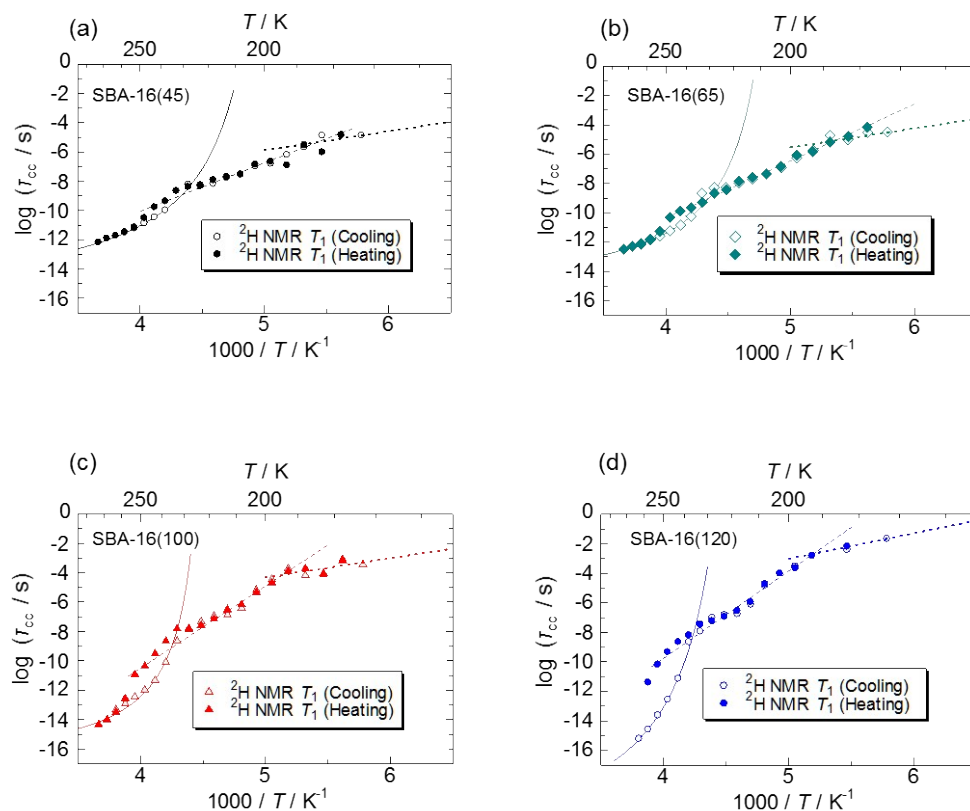

**Figure S6.** Correlation time of dynamics of D<sub>2</sub>O confined in (a) SBA-16(45), (b) SBA-16(65), (c) SBA-16(100), (d) SBA-16(120) as a function of temperature inverse. Solid line shows VFT fitting. Broken and dashed lines are Arrhenius fittings. The fitting parameters are shown in Table 2.
